# Supplementary material for: d-/l-Isothymidine incorporation in the core sequence of aptamer BC15 enhanced its binding affinity to the hnRNP A1 protein
Source: Royal Society of Chemistry journal article supplement (doi:10.1039/c8ob01454j), 2018-01-01
Supplement: c8ob01454j1.pdf [file c8ob01454j1.pdf]

**D-/L-isothymidine incorporation in core sequence of aptamer BC15  
enhanced its binding affinity to hnRNP A1 protein**

**Electronic Supplementary Information**

Liyu Li<sup>†,a</sup>, Xiantao Yang<sup>†,a,c</sup>, Kunfeng Li<sup>a</sup>, Guangpu Zhang<sup>a</sup>, Yuan Ma<sup>a</sup>, Baobin Cai<sup>a</sup>, Shaohua Li<sup>b</sup>, Hongmei Ding<sup>b</sup>, Jiali Deng<sup>a</sup>, Xiyang Nan<sup>a</sup>, Jing Sun<sup>a</sup>, Yun Wu<sup>a</sup>, Ningsheng Shao<sup>b</sup>, Lihe Zhang<sup>a</sup> and Zhenjun Yang<sup>\*,a</sup>

---

*a. State Key Laboratory of Natural and Biomimetic Drugs, School of Pharmaceutical Sciences, Peking University, 38 Xueyuan Road, Beijing 100191, China.*

*b. Department of Biochemistry and Molecular Biology, Beijing Institute of Basic Medical Sciences, Beijing, China.*

*c. School of Pharmacy, Chengdu Medical College, 783 Xindu Avenue, Xindu District, Chengdu 610500, China.*

*† These authors contributed equally to this paper.*

*\* To whom correspondence should be addressed. Tel. & Fax: +86-10-82802503. E-mail: yangzj@bjmu.edu.cn.*

## Content

**Figure S1.** HPLC separation of BC15-31 and the variants (BC15-31 as example, the trace shown here is representative for the purification of all variants of the parent oligonucleotide, regardless of the number and location of the isoT residues in each case). Dionex UltiMate 3000 HPLC, XBridge™ OST C18 column (2.5 μm, 10 mm × 50 mm), gradient program: 15-35% eluent A in 35 min (A: CH<sub>3</sub>CN; B: 0.1 M Et<sub>3</sub>N-CH<sub>3</sub>COOH in water, pH = 7.7), column temperature 40 °C, flow rate 1.5 mL/min.

**Figure S2.** Purity identification of BC15-31 and the variants by analytical HPLC (Since all oligos had similar traces upon their initial purification (Figure S1) and the analogous oligo peak were collected in all cases, the post-purification assay data are expected to be very similar for all oligos, parent BC15-31 oligo and 4 randomly selected variants were assayed to representatively verify the purity. Trace a: parent BC15-31, trace b: BC15-31-3<sub>L</sub>, trace c: BC15-31-26<sub>D</sub>, trace d: BC15-31-3<sub>L</sub>30<sub>D</sub>, trace e: BC15-31-3<sub>D</sub>15<sub>D</sub>). Agilent 1200 HPLC, XBridge™ OST C18 column (2.5 μm, 10 mm × 50 mm), gradient program: 0-25% eluent A in 35 min (A: CH<sub>3</sub>CN; B: 0.1 M Et<sub>3</sub>N-CH<sub>3</sub>COOH in water, pH = 7.7), column temperature 25 °C, flow rate 1.5 mL/min.

**Figure S3.** MALDI-TOF-MS of BC15-31 and its variants.

**Figure S4.** Surface plasmon resonance of BC15 (A) and BC15-31 (B) and BC15-27 (C) and NC (D) with hnRNP A1. DNA sequences are given in the section of ‘Materials and Methods’. The concentrations of protein were 5, 10, 50, 100, 200, 500, 1000nM, respectively. The data were fitted in a Langmuir Binding (1:1) model.

**Figure S5.** ELISA results of mismatched BC15-31 variants and hnRNP A1.

**Figure S6.** Characterization of Bis-D-/L-isoT-modified BC15-31 combine with hepatocarcinoma slides by fluorescent inverted microscope imaging (10×). BC15-31 and blank as control. Hepatocarcinoma slides were incubated with FAM-labeled different aptamers. Basal brightness of three groups is different because of the various hepatocarcinoma slides thickness. Bar = 100 μm.

**Table S1.** Mass spectrometry analysis results of the potential protein targets of BC15-31 (A) and BC15 lane (B)

**Table S2.** Sequences of mismatched BC15-31 variants.

**Table S3.** BC15-31 and D/L-isoT modified variants.

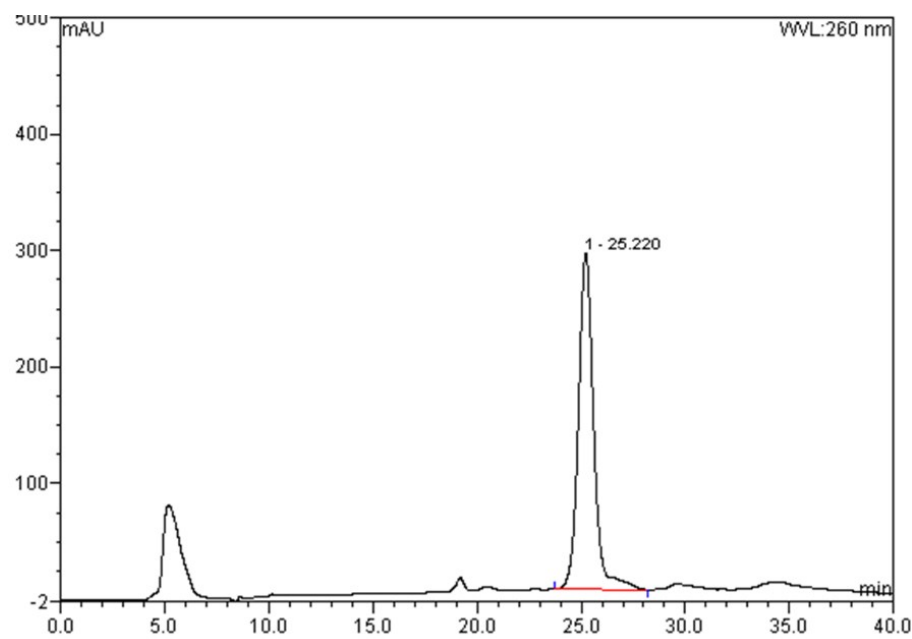

**Figure S1.** HPLC separation of BC15-31 and the variants (BC15-31 as example, the trace shown here is representative for the purification of all variants of the parent oligonucleotide, regardless of the number and location of the isoT residues in each case). Dionex UltiMate 3000 HPLC, XBridge™ OST C18 column (2.5  $\mu$ m, 10 mm  $\times$  50 mm), gradient program: 15-35% eluent A in 35 min (A: CH<sub>3</sub>CN; B: 0.1 M Et<sub>3</sub>N-CH<sub>3</sub>COOH in water, pH = 7.7), column temperature 40 °C, flow rate 1.5 mL/min.

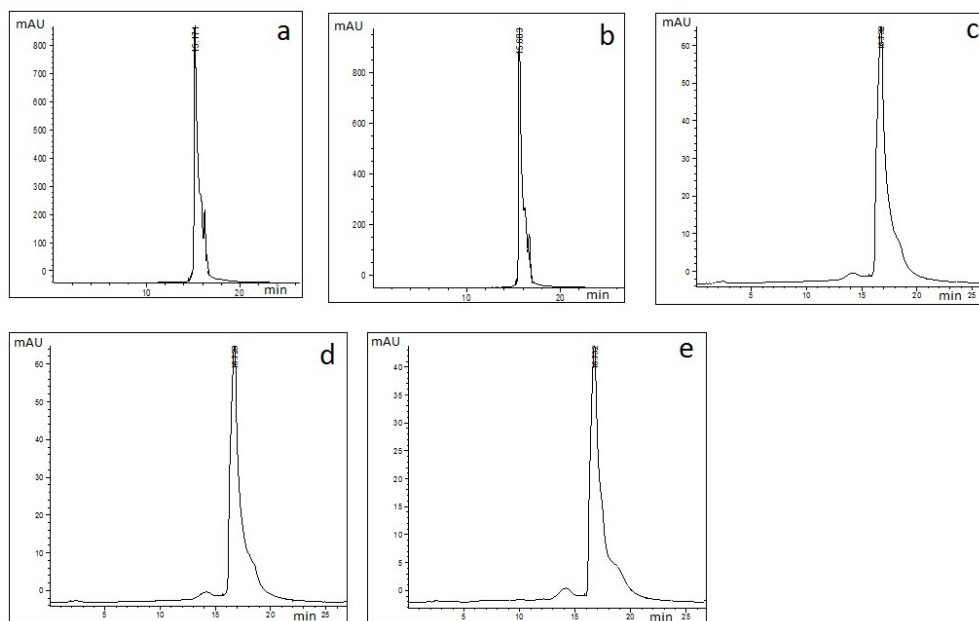

**Figure S2.** Purity identification of BC15-31 and the variants by analytical HPLC (Since all oligos had similar traces upon their initial purification (Figure S1) and the analogous oligo peak were collected in all cases, the post-purification assay data are expected to be very similar for all oligos, parent BC15-31 oligo and 4 randomly selected variants were assayed to representatively verify the purity. Trace a: parent BC15-31, trace b: BC15-31-3<sub>L</sub>, trace c: BC15-31-26<sub>D</sub>, trace d: BC15-31-3<sub>L</sub>30<sub>D</sub>, trace e: BC15-31-3<sub>D</sub>15<sub>D</sub>). Agilent 1200 HPLC, XBridge™ OST C18 column (2.5  $\mu$ m, 10 mm  $\times$  50 mm), gradient program: 0-25% eluent A in 35 min (A: CH<sub>3</sub>CN; B: 0.1 M Et<sub>3</sub>N-CH<sub>3</sub>COOH in water, pH = 7.7), column temperature 25 °C, flow rate 1.5 mL/min.

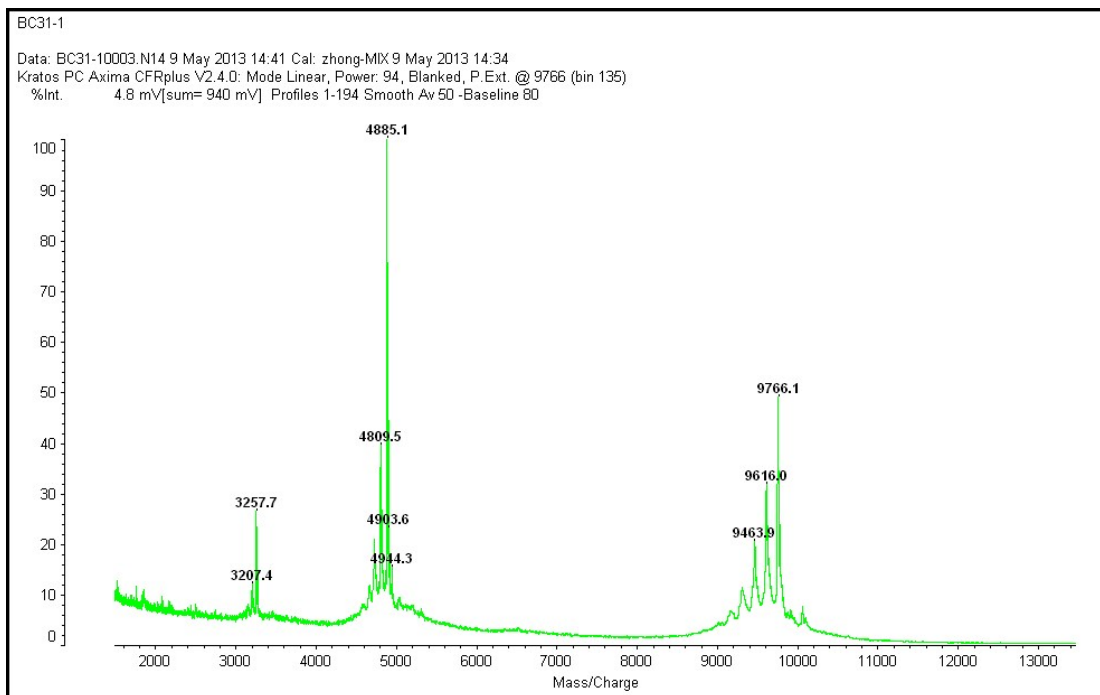

**Figure S3. MALDI-TOF-MS of BC15-31 and its variants.**

**BC15-31, Found: 9766; Calcd: 9765.**

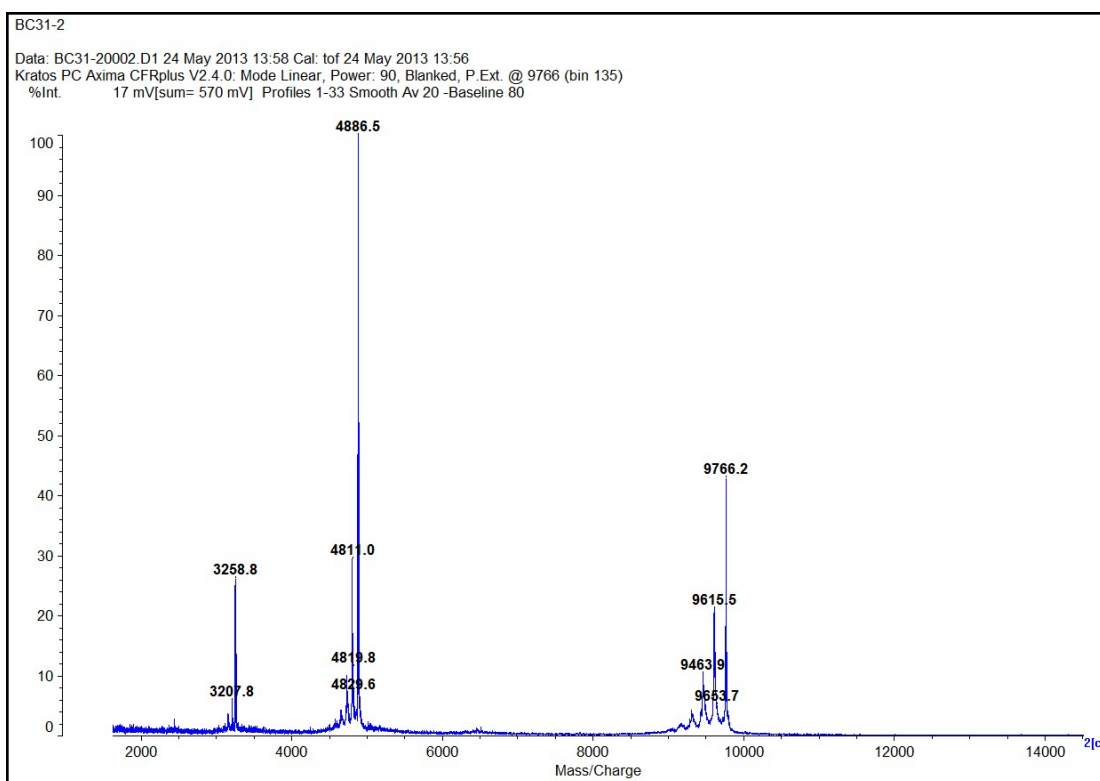

**BC15-31-3L, Found: 9766; Calcd: 9765.**

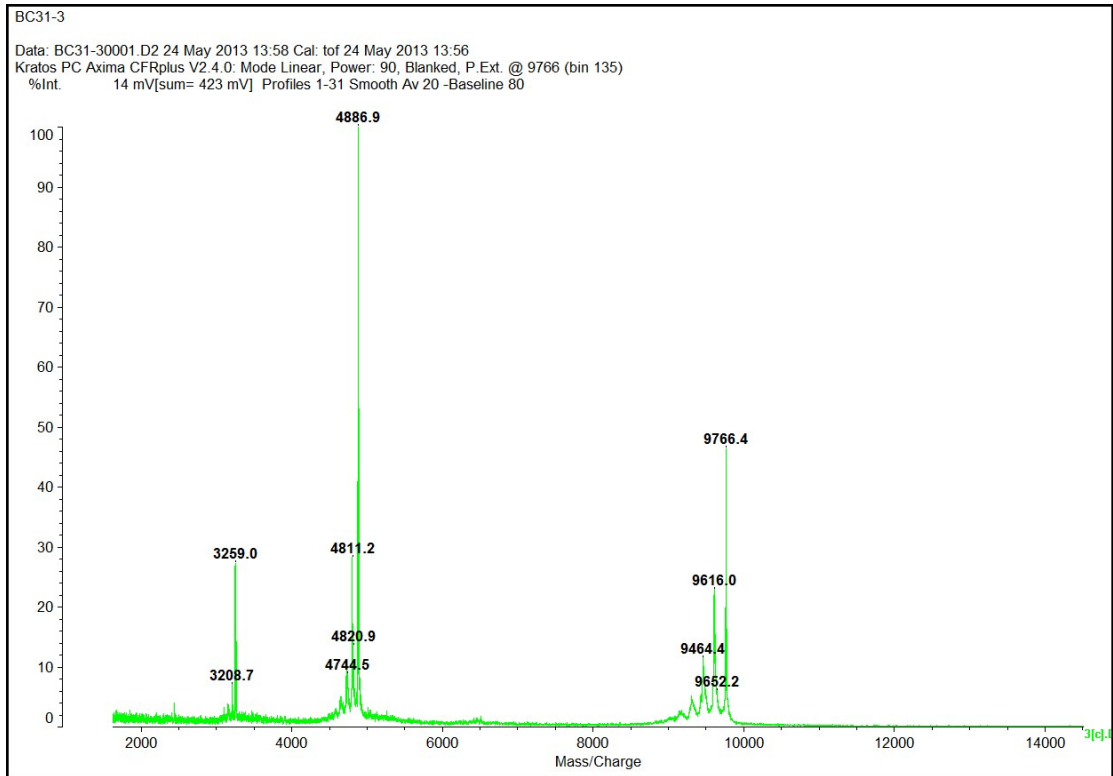

**BC15-31-3D**, Found: 9766; Calcd: 9765.

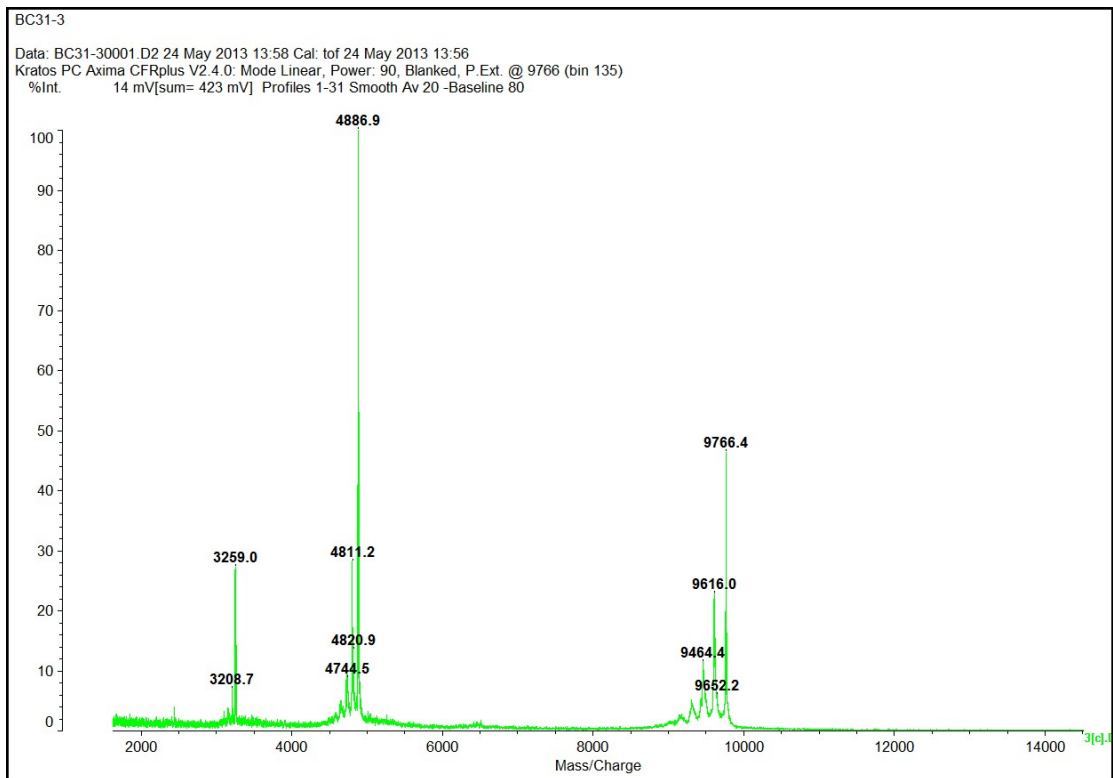

**BC15-31-3L/30L**, Found: 9766; Calcd: 9765.

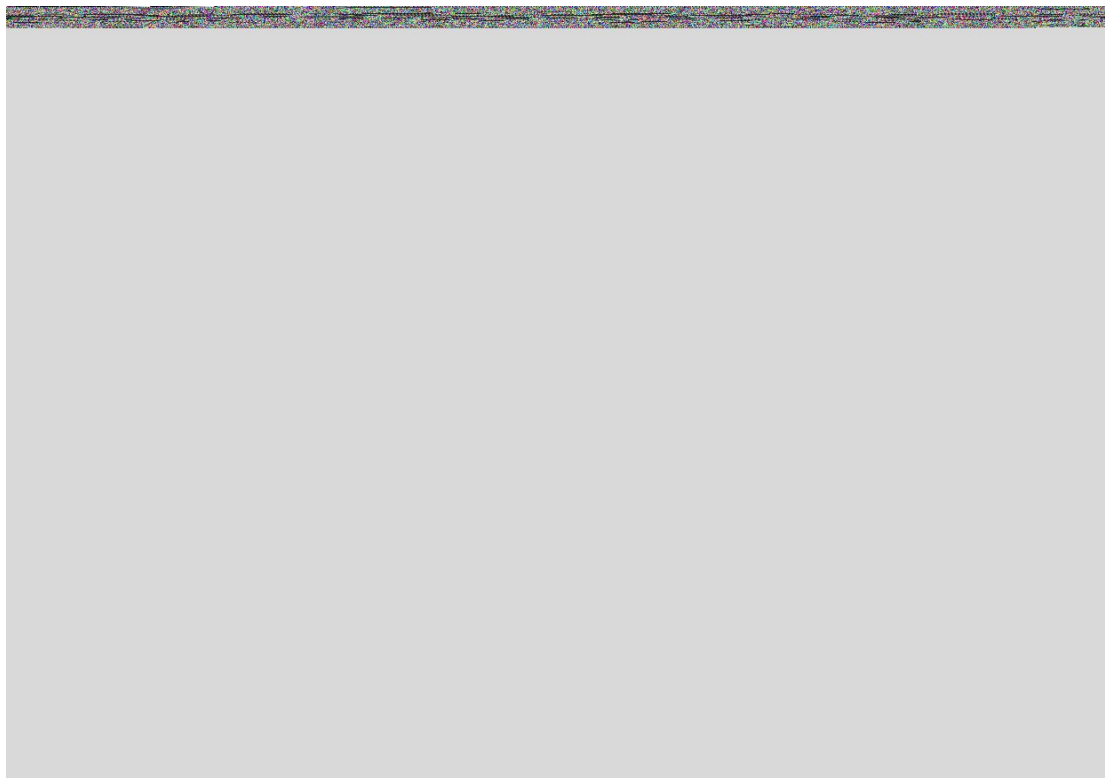

**BC15-31-1L/30L**, Found: 9766; Calcd: 9765.

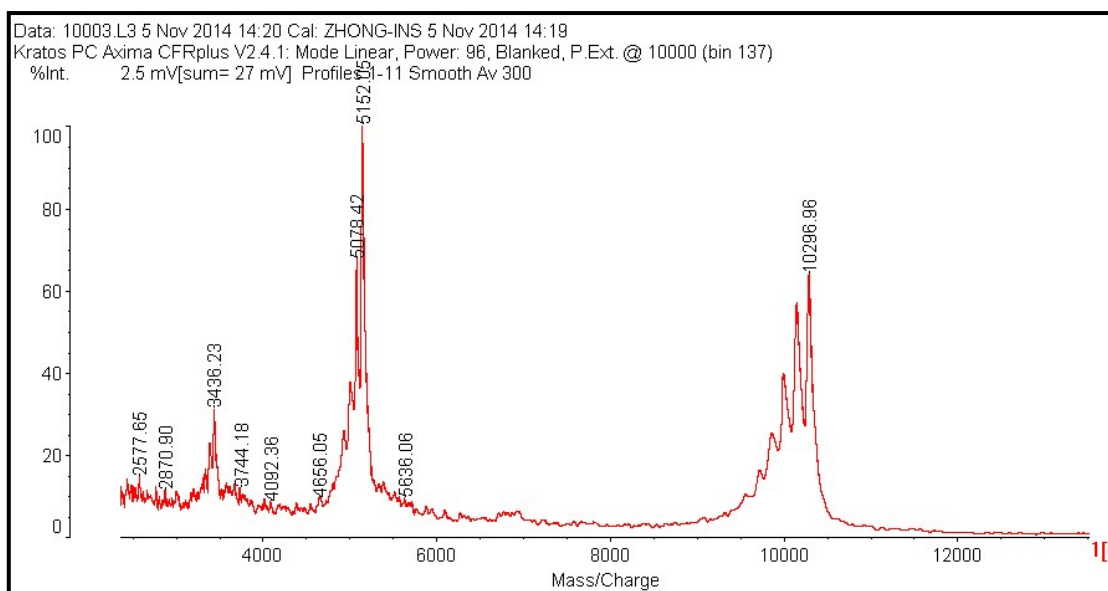

**Fam-BC15-31**, Found: 10297; Calcd: 10302.

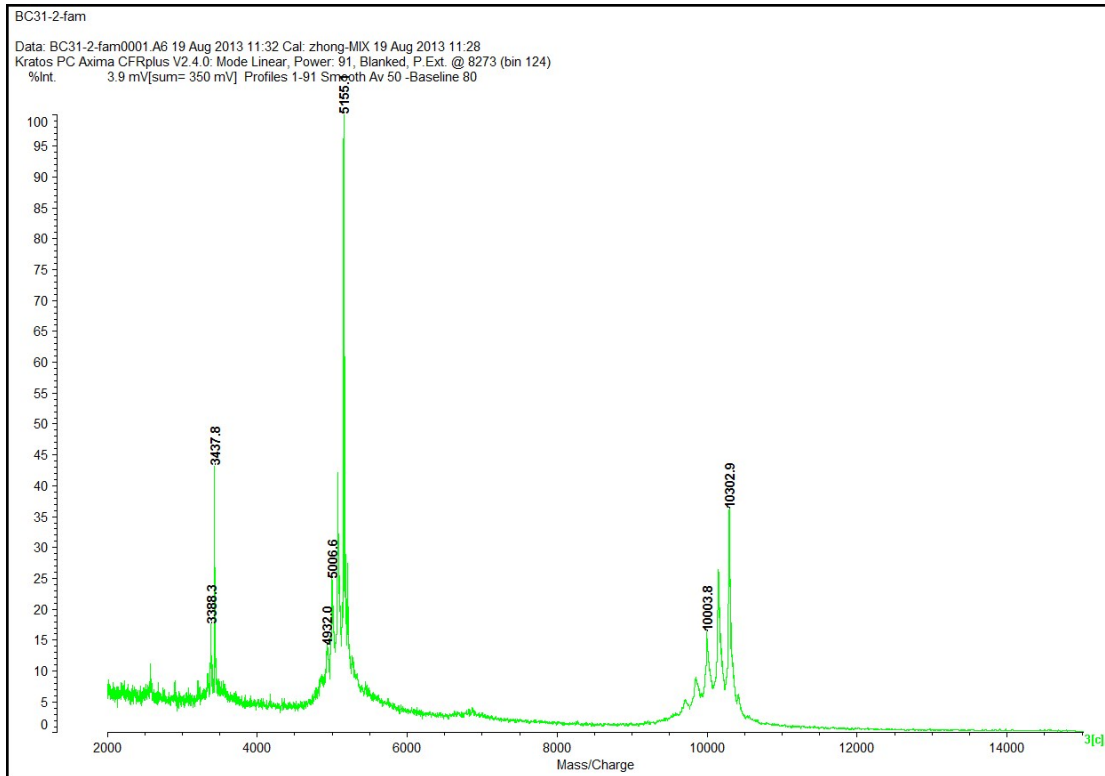

Fam-BC15-31-1L/30L, Found: 10303; Calcd: 10302.

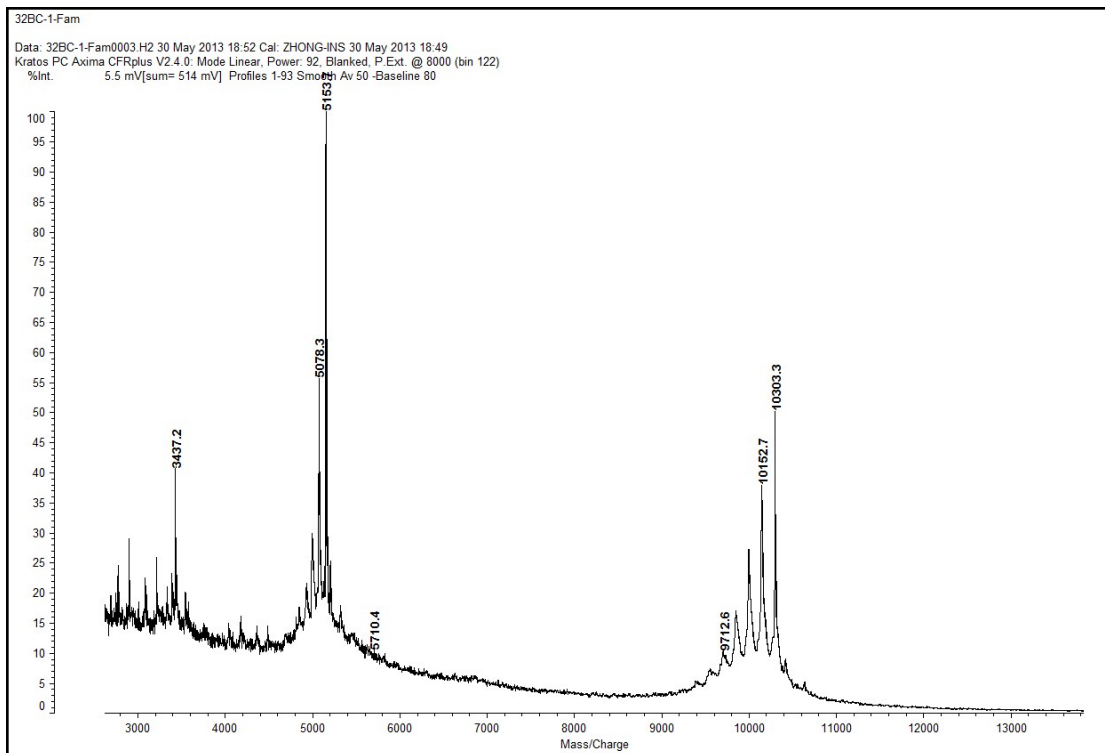

Fam-BC15-31-1L/3L, Found: 10303; Calcd: 10302.

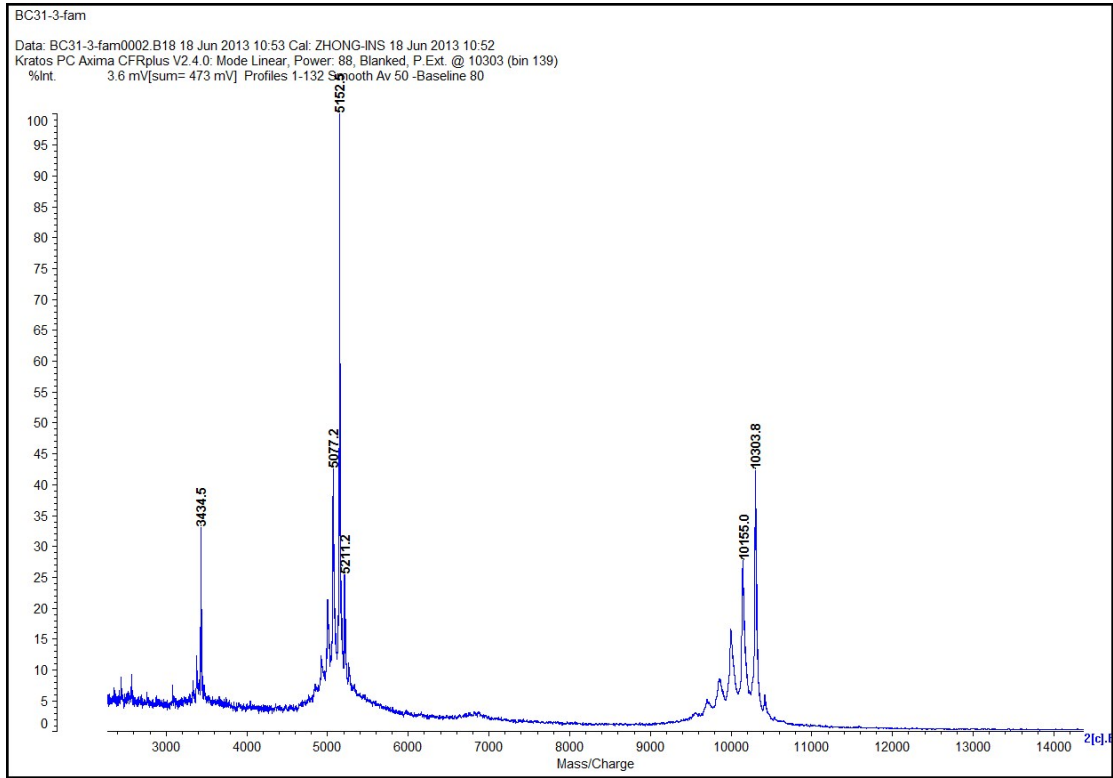

**Fam-BC15-31-3L/30L**, Found: 10303; Calcd: 10302.

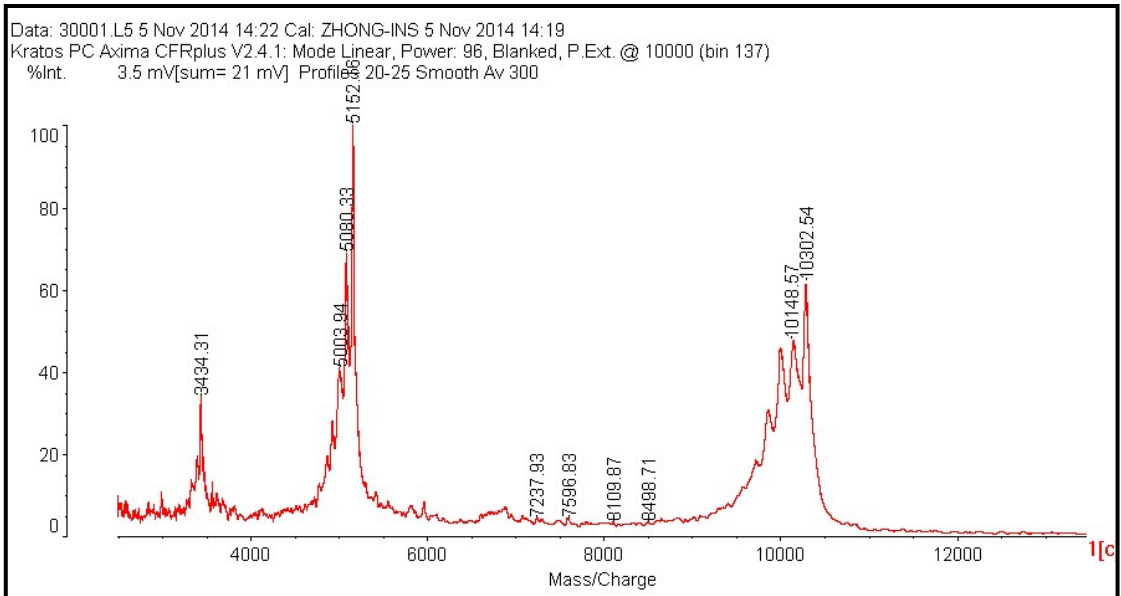

**Fam-BC15-31-3D/30D**, Found: 10302; Calcd: 10302.



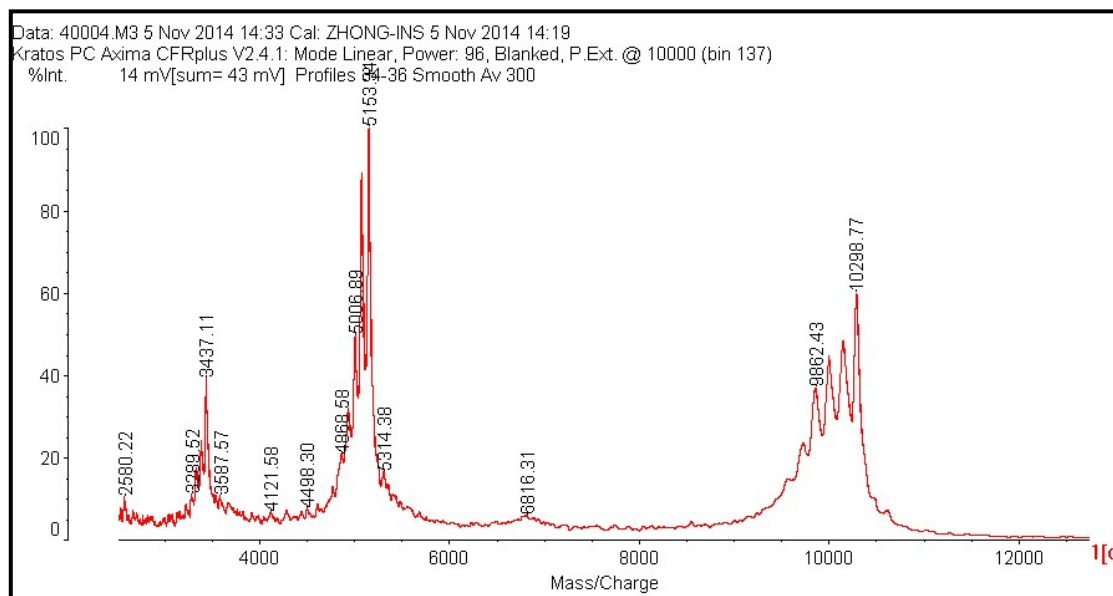

**Fam-BC15-31-3L/30D**, Found: 10299; Calcd: 10302.

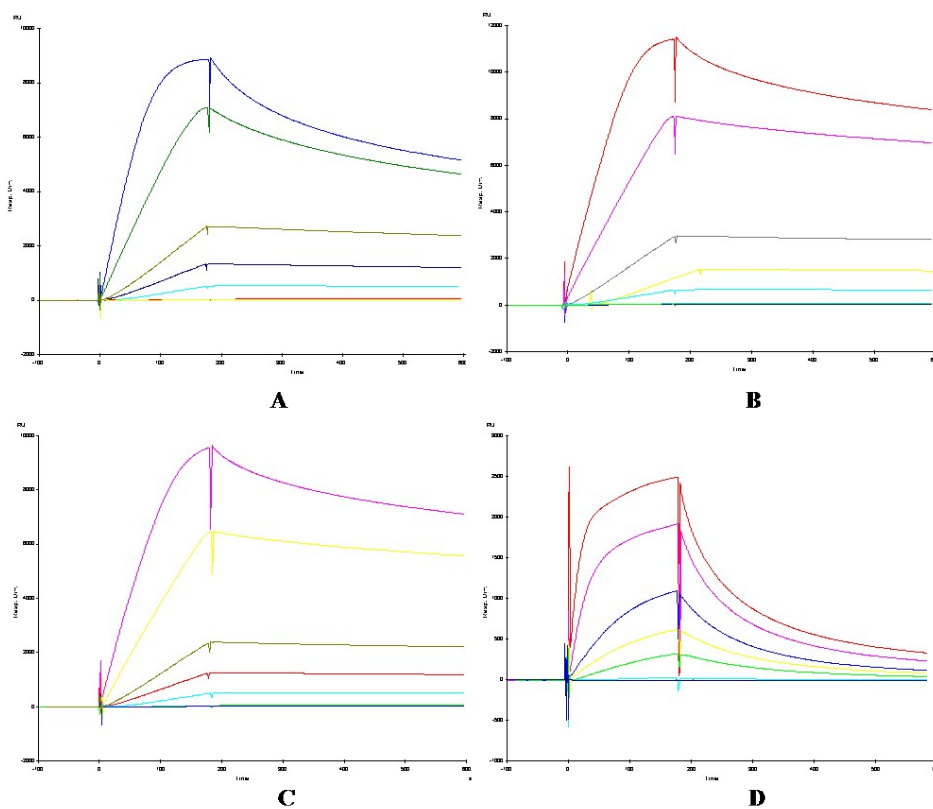

**Figure S4.** Surface plasmon resonance of BC15 (A) and BC15-31(B) and BC15-27(C) and NC(D) with hnRNP A1.

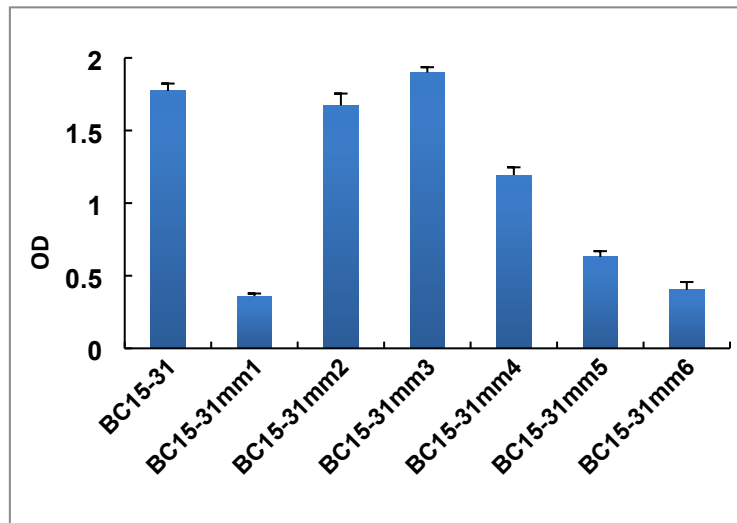

**Figure S5.** ELISA results of mismatched BC15-31 variants and hnRNP A1.

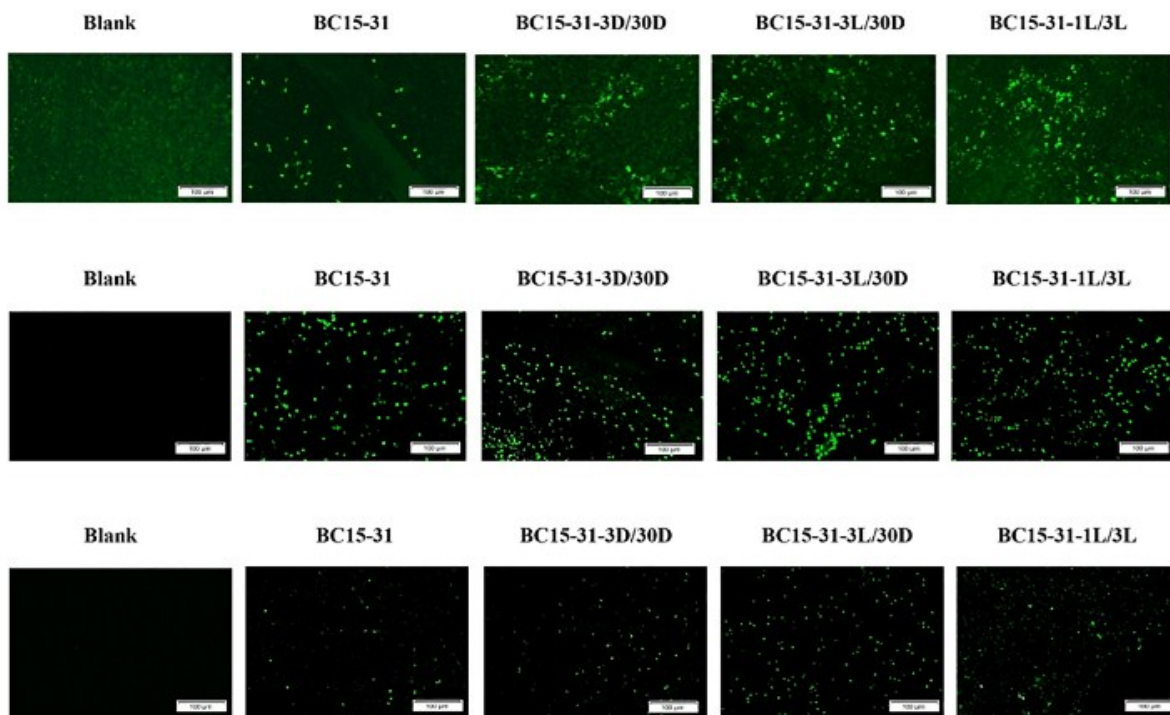

**Figure S6.** Characterization of Bis-D-/L-IsoT-modified BC15-31 combine with hepatocarcinoma slides by fluorescent inverted microscope imaging (10×). BC15-31 and blank as control.



**Table S1.** Mass spectrometry analysis results of the potential protein targets of BC15-31 (A) and BC15 lane (B)

**A**

| Accession | Description                                                                                             | Score |
|-----------|---------------------------------------------------------------------------------------------------------|-------|
| F8W617    | Heterogeneous nuclear ribonucleoprotein A1 OS=Homo sapiens GN=HNRNPA1 PE=2<br>SV=2 - [F8W617_HUMAN]     | 1053  |
| P22626    | Heterogeneous nuclear ribonucleoproteins A2/B1 OS=Homo sapiens GN=HNRNPA2B1<br>PE=1 SV=2 - [ROA2_HUMAN] | 833   |
| Q15717    | ELAV-like protein 1 OS=Homo sapiens GN=ELAVL1 PE=1 SV=2 - [ELAV1_HUMAN]                                 | 146   |
| Q13151    | Heterogeneous nuclear ribonucleoprotein A0 OS=Homo sapiens GN=HNRNPA0 PE=1<br>SV=1 - [ROA0_HUMAN]       | 123   |
| Q02878    | 60S ribosomal protein L6 OS=Homo sapiens GN=RPL6 PE=1 SV=3 - [RL6_HUMAN]                                | 107   |

**B**

| Accession | Description                                                                                             | Score |
|-----------|---------------------------------------------------------------------------------------------------------|-------|
| F8W617    | Heterogeneous nuclear ribonucleoprotein A1 OS=Homo sapiens GN=HNRNPA1 PE=2<br>SV=2 - [F8W617_HUMAN]     | 961   |
| P22626    | Heterogeneous nuclear ribonucleoproteins A2/B1 OS=Homo sapiens GN=HNRNPA2B1<br>PE=1 SV=2 - [ROA2_HUMAN] | 920   |
| Q15717    | ELAV-like protein 1 OS=Homo sapiens GN=ELAVL1 PE=1 SV=2 - [ELAV1_HUMAN]                                 | 137   |
| Q02878    | 60S ribosomal protein L6 OS=Homo sapiens GN=RPL6 PE=1 SV=3 - [RL6_HUMAN]                                | 124   |
| Q13151    | Heterogeneous nuclear ribonucleoprotein A0 OS=Homo sapiens GN=HNRNPA0 PE=1<br>SV=1 - [ROA0_HUMAN]       | 121   |
| P04264    | Keratin, type II cytoskeletal 1 OS=Homo sapiens GN=KRT1 PE=1 SV=6 - [K2C1_HUMAN]                        | 106   |

**Table S2.** Sequences of mismatched BC15-31 variants

| Name              | Sequence                                       |
|-------------------|------------------------------------------------|
| <b>BC15-31mm1</b> | 5'-TCT CCC CACCTA CCT CCC CTC TCT CTC TAT C-3' |
| <b>BC15-31mm2</b> | 5'-TGT GGC GAG GTA GGT CCC CTG TGT GTG TATC-3' |
| <b>BC15-31mm3</b> | 5'-TGT CCC GAG GTA GGT GGG GTG TGT GTG TATC-3' |
| <b>BC15-31mm4</b> | 5'-TGT GGC GAG GTA GGT GGG GTC TCT CTC TATC-3' |
| <b>BC15-31mm5</b> | 5'-TGT GGC GAG GTA GGT GGG GAG AGA GAG TATC-3' |
| <b>BC15-31mm6</b> | 5'-TGT GGC GAG GTA GGT GGG GAC ACA CAC TATC-3' |

**Table S3.** BC15-31 and D/L-isoT modified variants

| Name                   | Sequence(5'-3')                                                           | MALDI-TOF-MS |       |
|------------------------|---------------------------------------------------------------------------|--------------|-------|
|                        |                                                                           | Calcd.       | Found |
| <b>BC15-31</b>         | 5'-TGTGGCGAGGTAGGTGGGGTGTGTGTGTATC-3'                                     | 9765         | 9766  |
| <b>BC15-31-3L</b>      | 5'-TGT <sub>L</sub> GGCGAGGTAGGTGGGGTGTGTGTGTATC-3'                       | 9765         | 9766  |
| <b>BC15-31-3D</b>      | 5'-TGT <sub>D</sub> GGCGAGGTAGGTGGGGTGTGTGTGTATC-3'                       | 9765         | 9766  |
| <b>BC15-31-15L</b>     | 5'-TGTGGCGAGGTAGGT <sub>L</sub> GGGGTGTGTGTGTATC-3'                       | 9765         | 9766  |
| <b>BC15-31-15D</b>     | 5'-TGTGGCGAGGTAGGT <sub>D</sub> GGGGTGTGTGTGTATC-3'                       | 9765         | 9766  |
| <b>BC15-31-22L</b>     | 5'-TGTGGCGAGGTAGGTGGGGTGT <sub>L</sub> GTGTGTATC-3'                       | 9765         | 9766  |
| <b>BC15-31-22D</b>     | 5'-TGTGGCGAGGTAGGTGGGGTGT <sub>D</sub> GTGTGTATC-3'                       | 9765         | 9766  |
| <b>BC15-31-24L</b>     | 5'-TGTGGCGAGGTAGGTGGGGTGTGT <sub>L</sub> GTGTATC-3'                       | 9765         | 9766  |
| <b>BC15-31-24D</b>     | 5'-TGTGGCGAGGTAGGTGGGGTGTGT <sub>D</sub> GTGTATC-3'                       | 9765         | 9766  |
| <b>BC15-31-26L</b>     | 5'-TGTGGCGAGGTAGGTGGGGTGTGTGT <sub>L</sub> GTATC-3'                       | 9765         | 9766  |
| <b>BC15-31-26D</b>     | 5'-TGTGGCGAGGTAGGTGGGGTGTGTGT <sub>D</sub> GTATC-3'                       | 9765         | 9766  |
| <b>BC15-31-28L</b>     | 5'-TGTGGCGAGGTAGGTGGGGTGTGTGTGT <sub>L</sub> ATC-3'                       | 9765         | 9766  |
| <b>BC15-31-30L</b>     | 5'-TGTGGCGAGGTAGGTGGGGTGTGTGTGTAT <sub>L</sub> C-3'                       | 9765         | 9766  |
| <b>BC15-31-30D</b>     | 5'-TGTGGCGAGGTAGGTGGGGTGTGTGTGTAT <sub>D</sub> C-3'                       | 9765         | 9766  |
| <b>BC15-31-3L/30L</b>  | 5'-TGT <sub>L</sub> GGC GAG GTA GGT GGG GTG TGT GTG TAT <sub>L</sub> C-3' | 9765         | 9766  |
| <b>BC15-31-1L/30L</b>  | 5'- <sub>L</sub> GT GGC GAG GTA GGT GGG GTG TGT GTG TAT <sub>L</sub> C-3' | 9765         | 9766  |
| <b>BC15-31-1L/3L</b>   | 5'- <sub>L</sub> GT <sub>L</sub> GGC GAG GTA GGT GGG GTG TGT GTG TATC-3'  | 9765         | 9766  |
| <b>BC15-31-3L/30D</b>  | 5'-TGT <sub>L</sub> GGC GAG GTA GGT GGG GTG TGT GTG TAT <sub>D</sub> C-3' | 9765         | 9766  |
| <b>BC15-31-3D/30D</b>  | 5'-TGT <sub>D</sub> GGC GAG GTA GGT GGG GTG TGT GTG TAT <sub>D</sub> C-3' | 9765         | 9766  |
| <b>BC15-31-15D/30D</b> | 5'-TGTGGC GAG GTA GGT <sub>D</sub> GGG GTG TGT GTG TAT <sub>D</sub> C-3'  | 9765         | 9766  |
| <b>BC15-31-3L/15D</b>  | 5'-TGT <sub>L</sub> GGC GAG GTA GGT <sub>D</sub> GGG GTG TGT GTGTATC-3'   | 9765         | 9766  |
| <b>BC15-31-3D/15D</b>  | 5'-TGT <sub>D</sub> GGC GAG GTA GGT <sub>D</sub> GGG GTG TGT GTG TATC-3'  | 9765         | 9766  |
